# Supplementary material
Source: PubMed Central journal article supplement (PMC6876116)

## Supplementary Information

### **Peptide-nucleotide Antibiotic Microcin C Is a Potent Inducer of Stringent Response and Persistence in Both Sensitive and Producing Cells**

*Julia Piskunova*<sup>1,2,3</sup>, *Etienne Maisonneuve*<sup>3</sup>, *Elsa Germain*<sup>3</sup>, *Kenn Gerdes*<sup>3</sup>, and  
*Konstantin Severinov*<sup>1,2,4\*</sup>

<sup>1</sup>Skolkovo Institute of Science and Technology, Skolkovo 143025, Russia;

<sup>2</sup>Institute of Gene Biology, Russian Academy of Sciences, Moscow 119334, Russia;

<sup>3</sup>Department of Biology, University of Copenhagen, DK-2200 Copenhagen, Denmark

<sup>4</sup>Waksman Institute for Microbiology, Rutgers, The State University of New Jersey, Piscataway, NJ 08854

\*To whom correspondence should be addressed. Tel: +1 848 445 6096; Fax: +1 848 445 5735; Email: [severik@waksman.rutgers.edu](mailto:severik@waksman.rutgers.edu)

## **SUPPLEMENTARY MATERIALS AND METHODS**

### **Plate assay for McC production**

100  $\mu$ l of fresh night culture of *E. coli* BL21 (DE3) cells was mixed with 5 ml 0.7% (soft) LB agar and poured over a 1.5% LB agar plate. After drying, 5  $\mu$ l aliquots of tested cell cultures were applied on the plate surface. Plates were incubated at 30 °C for 10 h to allow the lawn to grow, and the sizes of growth inhibition zones formed around antibiotic solution drops were measured.

## FIGURE LEGENDS

**Figure S1 (related to Figure 5). McC producing culture has an increased frequency of (p)ppGpp “ON” cells.** Statistical distribution of the fluorescence level of individual cells from

(A) MG1655 *rpoS::mCherry*,

(B) MG1655 pp70 *rpoS::mCherry*, collected in exponential culture and analyzed by fluorescence microscopy.

Panels show the fluorescence distribution as a histogram consisting of 80 repartition bins (Log scale). The different colors represent three individual experiments including a total of more than 120,000 cells. For each strain, “n” represents the number of cells analyzed in individual sets. Right panel represents the same distribution using a logarithmic Y axis. Arrow points at the threshold applied to discriminate ON cells from OFF cells (n represents the number of ON cells observed in each set).

**Figure S2. Antibacterial activity of McC produced by wild type or isogenic  $\Delta relA$  or  $\Delta relA spoT$  strains.**

Aliquots of cultured medium after 2 (A) or 4 (B) hours of growth of McC producing strains were placed over a growing lawn of McC-sensitive *E. coli* cells. Growth inhibition zones are seen as clear circles on the turbid surface of cell lawn. See SUPPLEMENTARY MATERIALS AND METHODS for details.

**Figure S3. Antibacterial activity of McC produced by wild type or  $\Delta yejA$  strains.**

Aliquots of cultured medium after 2-hour growth of McC producing strains were placed over a growing lawn of McC-sensitive *E. coli* cells. Growth inhibition zones are seen as clear circles on the turbid surface of cell lawn. See SUPPLEMENTARY MATERIALS AND METHODS for details.

Figure S1

A

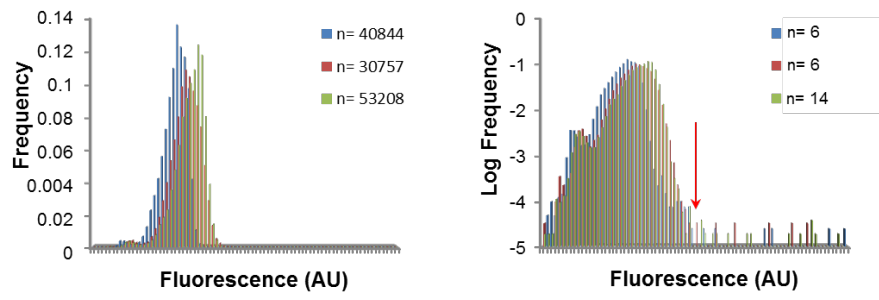

B

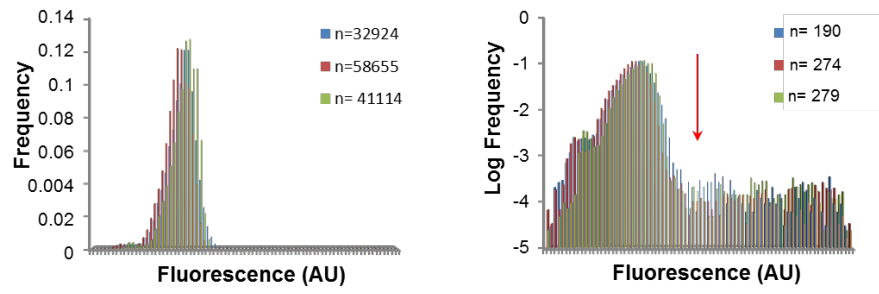

**Figure S2**

**A**

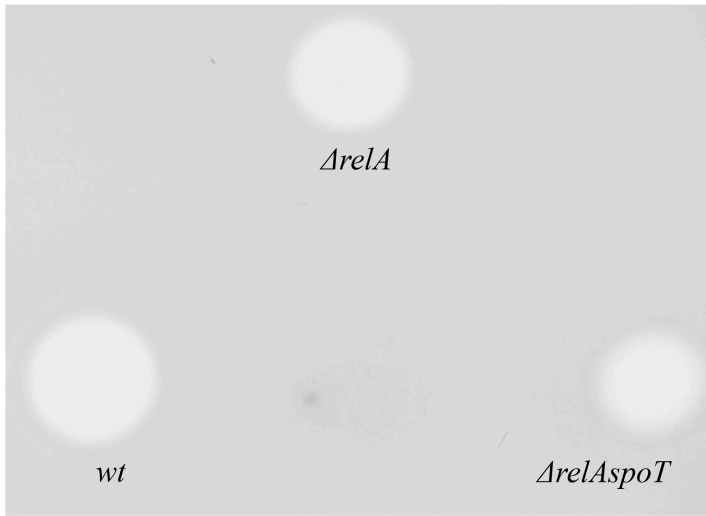

**B**

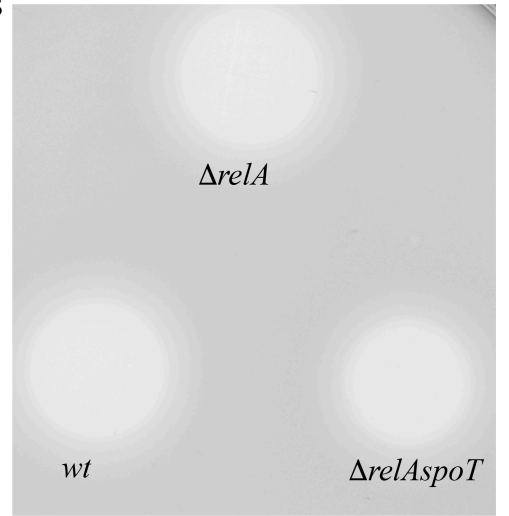

Figure S3

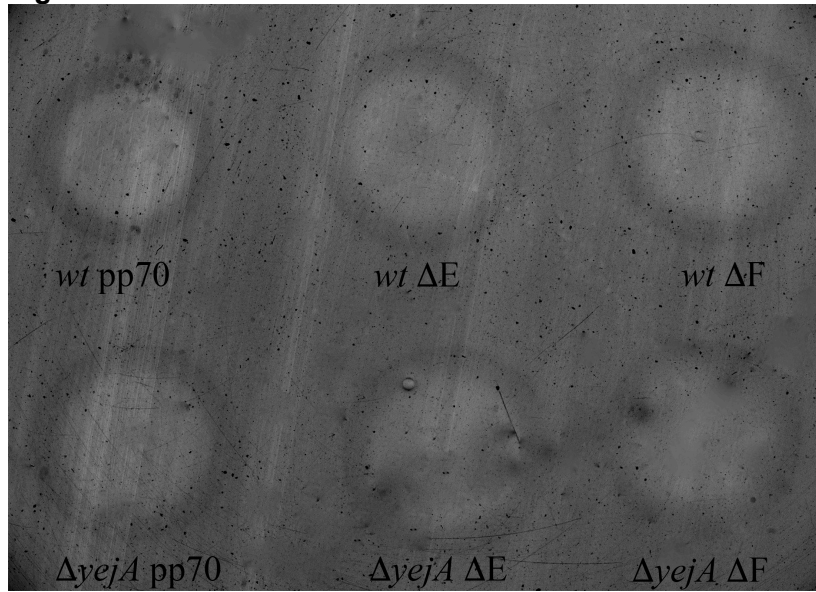

Supplement: NIHMS870730-supplement-Supplementary.pdf [file NIHMS870730-supplement-Supplementary.pdf]
